# Supplementary material
Source: Springer Nature journal article supplement (https://www.springermedizin.de/resource/supplementary/12865_2008_233_MOESM5_ESM.pdf/9427562)

A

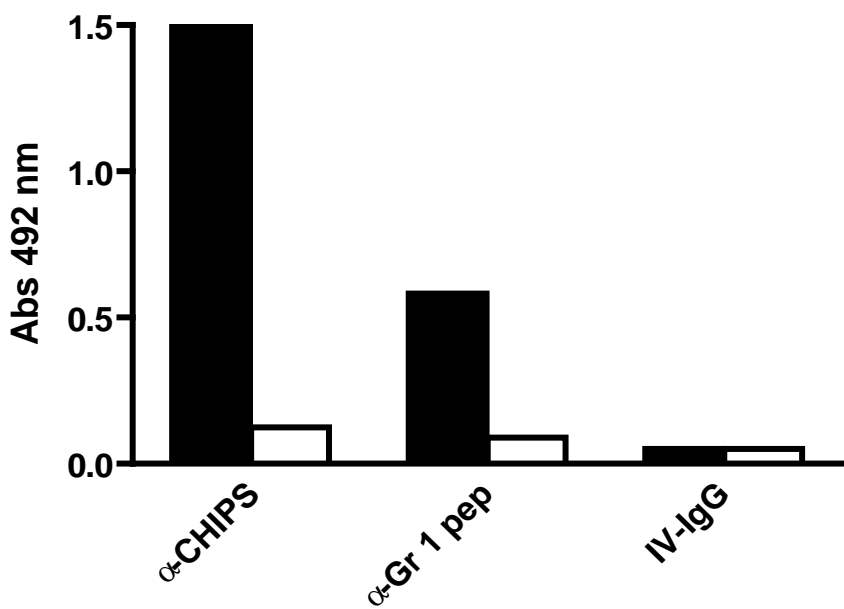

B

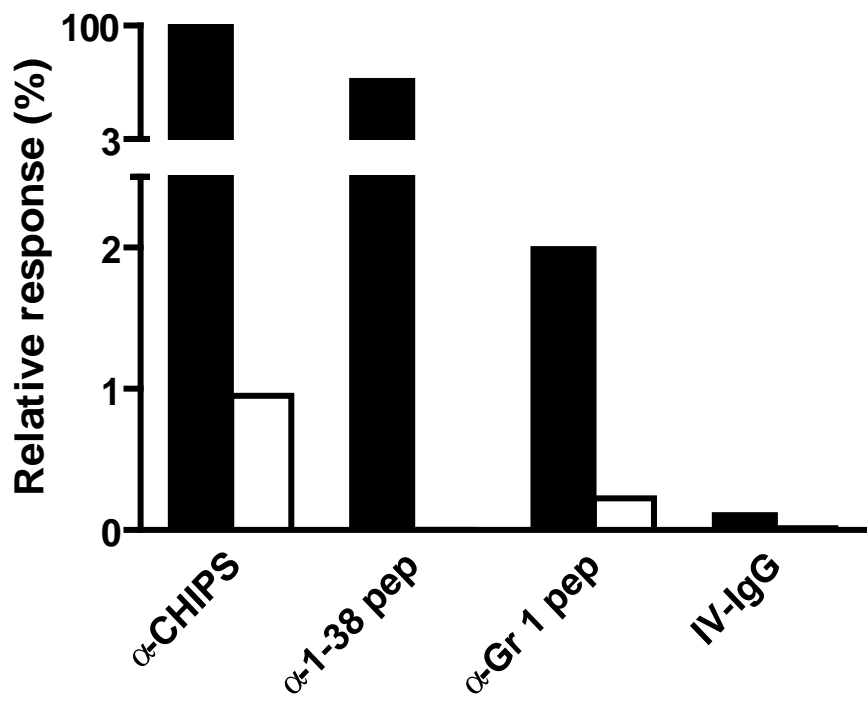

Supplement: MOESM5 [file 9427562]
